# Supplementary material
Source: publisher figshare collection journal article supplement (https://tandf.figshare.com/articles/dataset/_/1591877)
Supplement: Supplementary file 3 [file 1]

## Supplement B: Power and Sensitivity of Admixture Estimates

First we created 1,000 genomes each for pure, F<sub>1</sub>, F<sub>2</sub>, and backcrossed individuals. From each genome, genotypes at seven unlinked, diploid markers were randomly sampled to compare known admixture levels with estimates calculated from only a few markers. Estimates were observed to be accurate for the pure and F<sub>1</sub> individuals, but less accurate for the F<sub>2</sub> and backcross individuals (Figure A.1.1).

Next, analyses were performed again using only individuals (for ova diameter, egg energy concentration, and sperm motility) or families (for embryonic survival, juvenile growth, juvenile survival, and high-velocity swimming endurance) that were estimated to be genetically pure or F<sub>1</sub>. For each analysis, we used the final models identified in the initial analyses. In general, the conclusions drawn for admixture were consistent with those using the full data set. The details follow.

### Embryonic Survival

The conclusions drawn from using all of the data were the same as those from using only the pure and F<sub>1</sub> families.

Supplementary Table S.B.1. Results for regression analysis of embryonic survival using only F<sub>1</sub> and pure individuals. The model included familial average ancestry (Avg. % WCT) and temperature as fixed effects, as well as both dam and sire as random effects.

| Random effect | Variance |         |         |                       |
|---------------|----------|---------|---------|-----------------------|
| Dam           | 1.0866   |         |         |                       |
| Sire          | 0.3321   |         |         |                       |
| Fixed effect  | Estimate | SE      | Z-value | P                     |
| Intercept     | 4.16677  | 0.40275 | 10.346  | $< 2 \times 10^{-16}$ |
| Avg. % WCT    | −1.90032 | 0.91105 | −2.086  | 0.0370                |
| Temperature   | −0.05914 | 0.03036 | −1.948  | 0.0515                |

Supplementary Table S.B.2. Results for regression analysis of juvenile growth using only F1 and pure individuals. The model included familial average ancestry (Proportion WCT) as the only fixed effect and both dam and sire as random effects.

| Random effect | Variance  |
|---------------|-----------|
| Dam           | 0.0096028 |
| Sire          | 0.0013147 |

  

| Fixed effect   | Estimate | SE      | df     | <i>t</i> -value | <i>P</i>               |
|----------------|----------|---------|--------|-----------------|------------------------|
| Intercept      | 0.59535  | 0.02577 | 22.165 | 23.101          | $< 2 \times 10^{-16}$  |
| Proportion WCT | 0.38047  | 0.06761 | 21.048 | 5.627           | $1.375 \times 10^{-5}$ |

Supplementary Table S.B.3. Results for regression analysis of juvenile survival using only F1 and pure individuals. The model included familial average ancestry (Avg. % WCT) and tank density as the only fixed effects, as well as both dam and sire as random effects.

| Random effect | Variance |
|---------------|----------|
| Dam           | 0.2046   |
| Sire          | 0.2634   |

  

| Fixed effect | Estimate | SE       | Z-value | <i>P</i> |
|--------------|----------|----------|---------|----------|
| Intercept    | 1.227516 | 0.377588 | 3.251   | 0.00115  |
| Avg. % WCT   | 0.128288 | 0.480181 | 0.267   | 0.78934  |
| Tank density | 0.006435 | 0.004184 | 1.538   | 0.12406  |

Supplementary Table S.B.4. Results for regression analysis of juvenile survival using only F1 and pure individuals. The model included tank density as the only fixed effect and both dam and sire as random effects.

| Random effect | Variance |
|---------------|----------|
| Dam           | 0.2074   |
| Sire          | 0.2621   |

  

| Fixed effect | Estimate | SE       | Z-value | <i>P</i> |
|--------------|----------|----------|---------|----------|
| Intercept    | 1.265557 | 0.351463 | 3.601   | 0.000317 |
| Tank density | 0.006234 | 0.004128 | 1.510   | 0.130968 |

### High-Velocity Swimming Endurance

In the initial analysis, Rainbow Trout were compared with hybrid trout. Because no differentiation was made among hybrid classes, no sensitivity analysis was needed.

### Ova Diameter

The analysis was dominated by pure Rainbow Trout, and the removal of hybrid individuals that were not F<sub>1</sub>s resulted in only three remaining data points. Because the sample size was so small, the analysis was not performed.

### Egg Energy Concentration

The conclusions did not change.

Supplementary Table S.B.5. Results for regression analysis of egg energy concentration using only F<sub>1</sub> and pure individuals. The model included dam ancestry (Proportion WCT) as the only fixed effect and both dam and sire as random effects.

| Random effect | Variance |  |  |  |  |
|---------------|----------|--|--|--|--|
| Dam           | 0.2314   |  |  |  |  |

  

| Fixed effect   | Estimate | SE     | df      | <i>t</i> -value | <i>P</i>              |
|----------------|----------|--------|---------|-----------------|-----------------------|
| Intercept      | 8.8579   | 0.1126 | 26.5570 | 78.671          | $< 2 \times 10^{-16}$ |
| Proportion WCT | -1.1099  | 0.3403 | 25.6440 | -3.262          | 0.00312               |

### Sperm Motility

The final model did not include admixture as a parameter.
